# Supplementary material for: Empirical ways to identify novel Bedaquiline resistance mutations in AtpE
Source: PubMed Central journal article supplement (PMC6541270; doi:10.1371/journal.pone.0217169), 2019-05-29
Supplement: pone.0217169.s001.pdf [file pone.0217169.s001.pdf]

**S1 Table:** The list of different features used to build the empirical model for predicting novel resistance associated mutations in bedaquiline.

| <b>Feature</b>                    | <b>Effect measured</b>                                            | <b>Technique</b>       | <b>p-value*</b> |
|-----------------------------------|-------------------------------------------------------------------|------------------------|-----------------|
| mCSM_Stability                    | Protein stability                                                 | Graph based signatures | 0.31            |
| SDM                               | Protein stability                                                 | Graph based signatures | 0.90            |
| DUET                              | Protein stability                                                 | Graph based signatures | 0.65            |
| mCSM_PPI                          | Protein-protein interaction                                       | Graph based signatures | 0.68            |
| DynaMut                           | Conformational flexibility                                        | Normal mode analysis   | 0.60            |
| $\Delta\Delta G$ ENCoM            | Conformational flexibility                                        | Normal mode analysis   | 0.66            |
| $\Delta\Delta S$ ENCoM            | Changes in Entropy                                                | Normal mode analysis   | 0.66            |
| mCSM_Lig                          | Ligand binding affinity                                           | Graph based signatures | 0.03            |
| Distance from ligand binding site | Distance of the mutation from the drug (bedaquiline) binding site | Perl script (in-house) | $< 2.2e-16$     |
| SNAP2                             | Effect of single nucleotide substitution                          | Neural Network         | 0.0002          |

\*Welch two sample t-test
